# Supplementary material for: Overcoming the “Dark Side” of Technology—A Scoping Review on Preventing and Coping with Work-Related Technostress
Source: MDPI journal article supplement (doi:10.3390/ijerph19063625), 2022-03-18
Supplement: s1 [file s1]

**Table S7.** Critical Appraisal of Qualitative Studies.

|                                                                                                                                                 | Andreou<br>(2019) | Kwanya<br>et al.<br>(2012) | Lorrain<br>(2020) | Luoma et<br>al.<br>(2020) | Penn<br>(2016) | Pflügner<br>et al.<br>(2020) | Saxena &<br>Lamest<br>(2018) | Stadin et<br>al.<br>(2020) | Tarafdar<br>et al.<br>(2020) <sup>1</sup> |
|-------------------------------------------------------------------------------------------------------------------------------------------------|-------------------|----------------------------|-------------------|---------------------------|----------------|------------------------------|------------------------------|----------------------------|-------------------------------------------|
| Is there congruity between the stated philosophical perspective and the research methodology?                                                   | ✓                 | ✗                          | ✓                 | ✓                         | ✓              | ✓                            | ✓                            | ✓                          | ✗                                         |
| Is there congruity between the research methodology and the research question or objectives?                                                    | ✓                 | ✓                          | ✓                 | ✓                         | ✓              | ✓                            | ✓                            | ✓                          | ✓                                         |
| Is there congruity between the research methodology and the methods used to collect data?                                                       | ✓                 | ✓                          | ✓                 | ✓                         | ✓              | ✓                            | ✓                            | ✓                          | ✓                                         |
| Is there congruity between the research methodology and the representation and analysis of data?                                                | ✓                 | ✓                          | ✓                 | ✓                         | ✓              | ✓                            | ✓                            | ✓                          | ✓                                         |
| Is there congruity between the research methodology and the interpretation of results?                                                          | ✓                 | ✗                          | ✓                 | ✓                         | ✓              | ○                            | ✓                            | ✓                          | ✓                                         |
| Is there a statement locating the researcher culturally or theoretically?                                                                       | ✓                 | ✓                          | ✓                 | ✓                         | ✓              | ✓                            | ✗                            | ✓                          | ✓                                         |
| Is the influence of the researcher on the research, and vice- versa, addressed?                                                                 | ✓                 | ✗                          | ✓                 | ✗                         | ✓              | ✗                            | ✗                            | ✗                          | ✗                                         |
| Are participants, and their voices, adequately represented?                                                                                     | ✓                 | ✗                          | ✓                 | ✓                         | ✓              | ✗                            | ✓                            | ✓                          | ✓                                         |
| Is the research ethical according to current criteria or, for recent studies, and is there evidence of ethical approval by an appropriate body? | ✗                 | ✗                          | ✗                 | ✗                         | ✗              | ✗                            | ✗                            | ✓                          | ✗                                         |
| Do the conclusions drawn in the research report flow from the analysis, or interpretation, of the data?                                         | ✓                 | ✓                          | ✓                 | ✓                         | ✓              | ✓                            | ✓                            | ✓                          | ✓                                         |

*Note.* ✓ = fulfilled, ✗ = not fulfilled, ○ = partly fulfilled criteria. <sup>1</sup> Qualitative part of mixed-methods study.

**Table S8.** Critical Appraisal of Longitudinal Studies.

|                                                                                                            | Benlian<br>(2019) | Cho et al.<br>(2020) | Hauk<br>et al. (2019) | Ma et al.<br>(2021) <sup>1</sup> | Maier<br>et al. (2019) |
|------------------------------------------------------------------------------------------------------------|-------------------|----------------------|-----------------------|----------------------------------|------------------------|
| Were the two groups similar and recruited from the same population?                                        | ✓                 | ✓                    | ✓                     | ✓                                | ✓                      |
| Were the exposures measured similarly to assign people to both exposed and unexposed groups?               | ⊙                 | ⊙                    | ⊙                     | ⊙                                | ⊙                      |
| Was the exposure measured in a valid and reliable way?                                                     | ○                 | ✓                    | ✓                     | ✓                                | ✓                      |
| Were confounding factors identified?                                                                       | ✓                 | ✓                    | ✓                     | ✓                                | ✓                      |
| Were strategies to deal with confounding factors stated?                                                   | ✓                 | ✓                    | ✗                     | ✓                                | ✗                      |
| Were the groups/participants free of the outcome at the start of the study (or at the moment of exposure)? | ✓                 | ✗                    | ✓                     | ✓                                | ✓                      |
| Were the outcomes measured in a valid and reliable way?                                                    | ○                 | ✓                    | ✓                     | ✓                                | ✓                      |
| Was the follow up time reported and sufficient to be long enough for outcomes to occur?                    | ✓                 | ✓                    | ✗                     | ✗                                | ✓                      |
| Was follow up complete, and if not, were the reasons to loss to follow up described and explored?          | ✗                 | ✓                    | ✗                     | ✓                                | ○                      |
| Were strategies to address incomplete follow up utilized?                                                  | ✓                 | ✓                    | ✗                     | ✓                                | ✓                      |
| Was appropriate statistical analysis used?                                                                 | ✓                 | ✓                    | ✓                     | ✓                                | ○                      |

Note. ✓ = fulfilled, ✗ = not fulfilled, ○ = unclear or partly fulfilled criteria, ⊙ = criteria not applicable. <sup>1</sup> Study 2 in the paper.

**Table S9.** Critical Appraisal of Cross-Sectional Studies.

|                                                                          | Alnakhli<br>(2020) | Bauwens<br>et al.<br>(2021) | Becker et<br>al. (2021) | Brown et<br>al. (2014) | Califf &<br>Brooks<br>(2020) | Choi et<br>al. (2020) | Christ-<br>Brende-<br>mühl &<br>Schaar-<br>schmidt<br>(2020) | D'Arcy et<br>al. (2014) | Day et al.<br>(2012) | Delpe-<br>chitre et<br>al. (2019) |
|--------------------------------------------------------------------------|--------------------|-----------------------------|-------------------------|------------------------|------------------------------|-----------------------|--------------------------------------------------------------|-------------------------|----------------------|-----------------------------------|
| Were the criteria for inclusion in the sample clearly defined?           | ✓                  | ✗                           | ✓                       | ✗                      | ✓                            | ✗                     | ✗                                                            | ✓                       | ✗                    | ✓                                 |
| Were the study subjects and the setting described in detail?             | ✓                  | ✓                           | ✓                       | ✓                      | ✓                            | ✓                     | ✓                                                            | ✓                       | ✓                    | ✓                                 |
| Was the exposure measured in a valid and reliable way?                   | ✓                  | ✓                           | ✓                       | ✓                      | ✓                            | ○                     | ✓                                                            | ✓                       | ✓                    | ✓                                 |
| Were objective, standard criteria used for measurement of the condition? | ✓                  | ✓                           | ✓                       | ○                      | ✓                            | ✓                     | ✓                                                            | ○                       | ✓                    | ✓                                 |
| Were confounding factors identified?                                     | ✗                  | ✓                           | ✓                       | ✓                      | ✓                            | ✓                     | ✓                                                            | ✓                       | ✓                    | ✓                                 |
| Were strategies to deal with confounding factors stated?                 | ⊖                  | ✗                           | ✗                       | ✓                      | ✗                            | ✓                     | ✓                                                            | ✓                       | ✓                    | ✓                                 |
| Were the outcomes measured in a valid and reliable way?                  | ✓                  | ✓                           | ✓                       | ✓                      | ✓                            | ○                     | ✓                                                            | ✓                       | ✓                    | ✓                                 |
| Was appropriate statistical analysis used?                               | ✓                  | ✓                           | ✓                       | ✓                      | ✓                            | ✓                     | ✓                                                            | ✓                       | ✓                    | ✓                                 |

|                                                                          | Fieseler<br>et al.<br>(2014) | Fischer &<br>Riedl<br>(2020) | Gaudi-<br>oso et al.<br>(2017) | Gimpel et<br>al. (2019) | Goetz &<br>Böhm<br>(2020) | Harris et<br>al. (2013) | Harris et<br>al. (2015) | Hung et<br>al. (2011) | Hung et<br>al. (2015) | Hwang &<br>Cha<br>(2018) |
|--------------------------------------------------------------------------|------------------------------|------------------------------|--------------------------------|-------------------------|---------------------------|-------------------------|-------------------------|-----------------------|-----------------------|--------------------------|
| Were the criteria for inclusion in the sample clearly defined?           | x                            | x                            | x                              | ✓                       | ✓                         | ✓                       | ✓                       | ✓                     | ✓                     | ✓                        |
| Were the study subjects and the setting described in detail?             | ✓                            | ✓                            | ✓                              | ✓                       | ✓                         | ✓                       | ✓                       | ✓                     | ✓                     | ✓                        |
| Was the exposure measured in a valid and reliable way?                   | ✓                            | ✓                            | ✓                              | x                       | ✓                         | ✓                       | ✓                       | x                     | ✓                     | ✓                        |
| Were objective, standard criteria used for measurement of the condition? | ✓                            | ✓                            | ✓                              | x                       | ✓                         | ✓                       | ✓                       | ○                     | ✓                     | ✓                        |
| Were confounding factors identified?                                     | x                            | ✓                            | ✓                              | x                       | ✓                         | ✓                       | ✓                       | x                     | x                     | ✓                        |
| Were strategies to deal with confounding factors stated?                 | ⊗                            | ✓                            | ✓                              | ⊗                       | ✓                         | ✓                       | ✓                       | ⊗                     | ⊗                     | x                        |
| Were the outcomes measured in a valid and reliable way?                  | ✓                            | ✓                            | ✓                              | x                       | ✓                         | ✓                       | ✓                       | x                     | ✓                     | ✓                        |
| Was appropriate statistical analysis used?                               | ✓                            | ✓                            | ✓                              | ○                       | ✓                         | ✓                       | ✓                       | ✓                     | ✓                     | ✓                        |

|                                                                          | Ioannou<br>& Papaza-<br>eiropoulou<br>(2017) | Jena<br>(2015) | Kim &<br>Lee (2021) | Koo &<br>Wati<br>(2011) | Li &<br>Wang<br>(2020) | Liu et al.<br>(2019) | Ma et al.<br>(2021) <sup>1</sup> | Mellner<br>(2016) | Okolo et<br>al. (2018) | Pfaffinger<br>et al.<br>(2020) |
|--------------------------------------------------------------------------|----------------------------------------------|----------------|---------------------|-------------------------|------------------------|----------------------|----------------------------------|-------------------|------------------------|--------------------------------|
| Were the criteria for inclusion in the sample clearly defined?           | ✓                                            | ×              | ×                   | ×                       | ✓                      | ○                    | ○                                | ○                 | ×                      | ✓                              |
| Were the study subjects and the setting described in detail?             | ✓                                            | ✓              | ✓                   | ✓                       | ✓                      | ×                    | ✓                                | ✓                 | ×                      | ✓                              |
| Was the exposure measured in a valid and reliable way?                   | ✓                                            | ✓              | ✓                   | ✓                       | ✓                      | ✓                    | ✓                                | ✓                 | ✓                      | ✓                              |
| Were objective, standard criteria used for measurement of the condition? | ✓                                            | ✓              | ✓                   | ×                       | ✓                      | ✓                    | ✓                                | ✓                 | ✓                      | ✓                              |
| Were confounding factors identified?                                     | ×                                            | ×              | ×                   | ×                       | ○                      | ×                    | ✓                                | ✓                 | ×                      | ✓                              |
| Were strategies to deal with confounding factors stated?                 | ○                                            | ○              | ○                   | ○                       | ×                      | ○                    | ✓                                | ✓                 | ○                      | ✓                              |
| Were the outcomes measured in a valid and reliable way?                  | ✓                                            | ✓              | ✓                   | ✓                       | ✓                      | ✓                    | ✓                                | ✓                 | ✓                      | ✓                              |
| Was appropriate statistical analysis used?                               | ✓                                            | ✓              | ✓                   | ×                       | ✓                      | ✓                    | ✓                                | ✓                 | ✓                      | ✓                              |

|                                                                          | Pflügner<br>et al.<br>(2021) | Pirkka-<br>lainen et<br>al. (2017) | Pirkka-<br>lainen et<br>al. (2019) | Pullins<br>et al.<br>(2020) | Ragu-<br>Nathan<br>et al.<br>(2008) | Rayburn<br>et al.<br>(2021) | Shu et<br>al. (2011) | Shirish<br>(2021) | Suh &<br>Lee<br>(2017) | Tarafdar<br>et al.<br>(2010) | Tarafdar<br>et al.<br>(2015) |
|--------------------------------------------------------------------------|------------------------------|------------------------------------|------------------------------------|-----------------------------|-------------------------------------|-----------------------------|----------------------|-------------------|------------------------|------------------------------|------------------------------|
| Were the criteria for inclusion in the sample clearly defined?           | ✓                            | ✓                                  | ✓                                  | ✓                           | ○                                   | ○                           | ✓                    | ✓                 | ○                      | ✓                            | ✓                            |
| Were the study subjects and the setting described in detail?             | ✓                            | ✓                                  | ✓                                  | ✓                           | ✓                                   | ✓                           | ✓                    | ✓                 | ✓                      | ✓                            | ✓                            |
| Was the exposure measured in a valid and reliable way?                   | ✓                            | ✓                                  | ✓                                  | ✓                           | ✓                                   | ✓                           | ✓                    | ✓                 | ○                      | ✓                            | ✓                            |
| Were objective, standard criteria used for measurement of the condition? | ✓                            | ✓                                  | ✓                                  | ✓                           | ○                                   | ✓                           | ✓                    | ✓                 | ✓                      | ✓                            | ✓                            |
| Were confounding factors identified?                                     | ✓                            | ✓                                  | ✓                                  | ×                           | ✓                                   | ✓                           | ✓                    | ✓                 | ×                      | ×                            | ✓                            |
| Were strategies to deal with confounding factors stated?                 | ✓                            | ✓                                  | ✓                                  | ⊖                           | ✓                                   | ✓                           | ×                    | ✓                 | ⊖                      | ⊖                            | ×                            |
| Were the outcomes measured in a valid and reliable way?                  | ✓                            | ✓                                  | ✓                                  | ✓                           | ✓                                   | ✓                           | ✓                    | ✓                 | ○                      | ✓                            | ✓                            |
| Was appropriate statistical analysis used?                               | ✓                            | ✓                                  | ✓                                  | ✓                           | ✓                                   | ✓                           | ✓                    | ✓                 | ✓                      | ✓                            | ✓                            |

|                                                                          | Tarafdar et al. (2020) <sup>2</sup> | Turel & Gaudioso (2018) | Wang et al. (2008) | Wu et al. (2017) | Yener et al. (2020) | Yu et al. (2017) | Zainun et al. (2020) | Zhao et al. (2020) |
|--------------------------------------------------------------------------|-------------------------------------|-------------------------|--------------------|------------------|---------------------|------------------|----------------------|--------------------|
| Were the criteria for inclusion in the sample clearly defined?           | ×                                   | ○                       | ○                  | ○                | ×                   | ✓                | ×                    | ✓                  |
| Were the study subjects and the setting described in detail?             | ✓                                   | ✓                       | ✓                  | ✓                | ✓                   | ✓                | ✓                    | ✓                  |
| Was the exposure measured in a valid and reliable way?                   | ✓                                   | ✓                       | ○                  | ✓                | ✓                   | ✓                | ✓                    | ✓                  |
| Were objective, standard criteria used for measurement of the condition? | ✓                                   | ✓                       | ✓                  | ✓                | ✓                   | ○                | ✓                    | ✓                  |
| Were confounding factors identified?                                     | ×                                   | ✓                       | ×                  | ○                | ✓                   | ×                | ×                    | ✓                  |
| Were strategies to deal with confounding factors stated?                 | ⊗                                   | ✓                       | ×                  | ×                | ×                   | ⊗                | ⊗                    | ✓                  |
| Were the outcomes measured in a valid and reliable way?                  | ✓                                   | ✓                       | ✓                  | ✓                | ✓                   | ✓                | ✓                    | ✓                  |
| Was appropriate statistical analysis used?                               | ✓                                   | ✓                       | ✓                  | ✓                | ✓                   | ✓                | ✓                    | ✓                  |

Note. ✓ = fulfilled, × = not fulfilled, ○ = unclear or partly fulfilled criteria, ⊗ = criteria not applicable. <sup>1</sup> Study 1 in the paper. <sup>2</sup> Quantitative part of mixed-methods study.
